# Supplementary material for: Curcumin and synthetic analogs induce reactive oxygen species and decreases specificity protein (Sp) transcription factors by targeting microRNAs
Source: PubMed Central journal article supplement (PMC3522018; doi:10.1186/1471-2407-12-564), 2012-11-30
Supplement: 1471-2407-12-564-S1.pdf [file 1471-2407-12-564-S1.pdf]

## Supplemental Figure 1

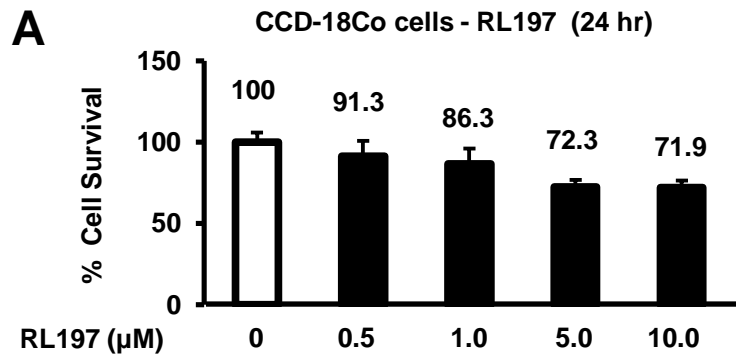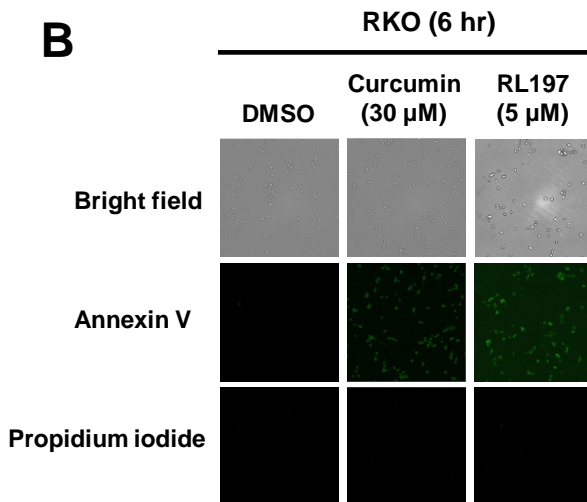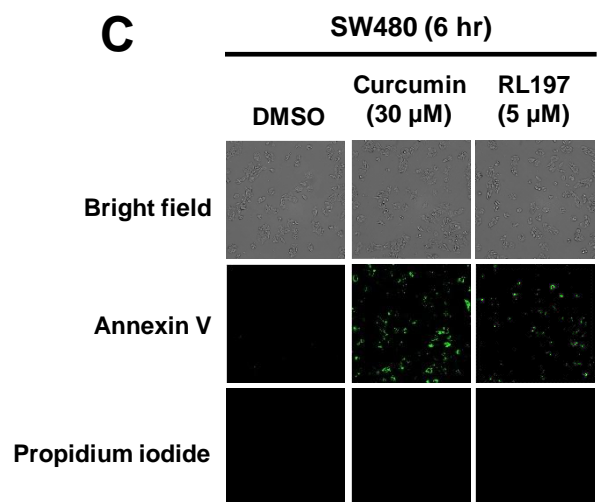

**Supplemental Figure 1.** Effects of RL197 on proliferation of CCD-18Co colon fibroblasts (A) and induction of Annexin V staining by curcumin and RL197 in RKO (B) and SW480 (C) colon cancer cells.
