# Supplementary material for: Curcumin and synthetic analogs induce reactive oxygen species and decreases specificity protein (Sp) transcription factors by targeting microRNAs
Source: PubMed Central journal article supplement (PMC3522018; doi:10.1186/1471-2407-12-564), 2012-11-30
Supplement: 1471-2407-12-564-S2.pdf [file 1471-2407-12-564-S2.pdf]

## Supplemental Figure 2

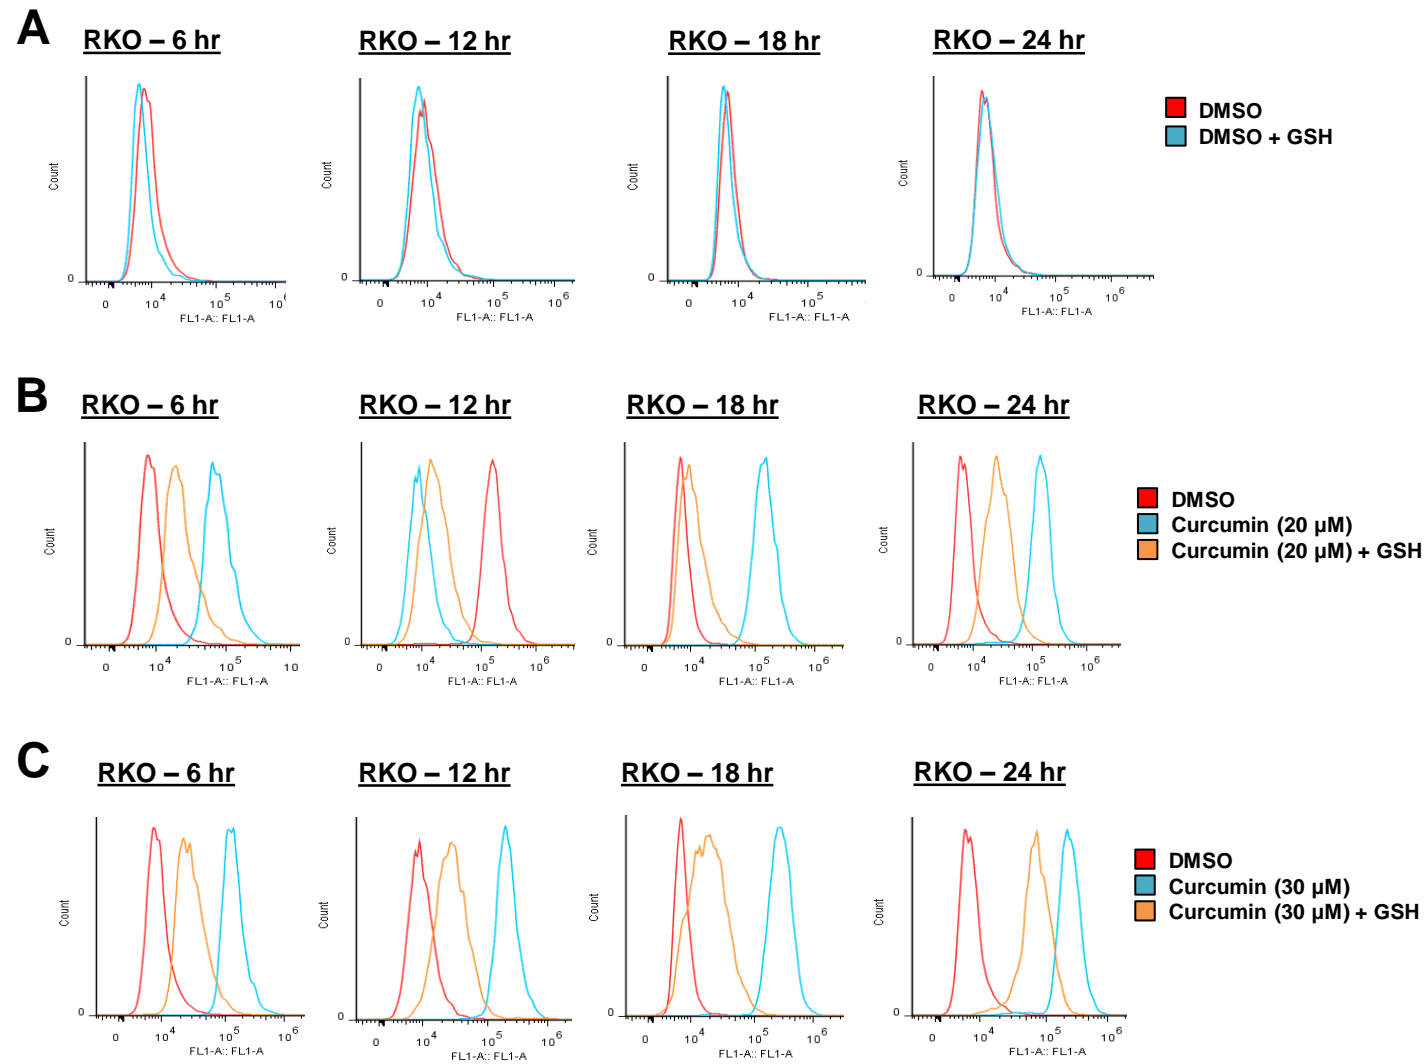

**Supplemental Figure 2.** ROS induction by curcumin. RKO cells were treated with 20 or 30  $\mu$ M curcumin alone or with GSH. ROS was determined 6, 12, 18 or 24 hr after treatment by FACS analysis as outlined in the Materials and Methods.
